# Supplementary material for: Immunogenicity and safety of 23-valent pneumococcal polysaccharide vaccine as a booster dose in 12- to 18-month-old children primed with 3 doses of 7-valent pneumococcal conjugate vaccine
Source: PubMed Central journal article supplement — Hum Vaccin Immunother. 2014 Apr 23;10(7):1859–65. doi: 10.4161/hv.28642 (PMC4186054; doi:10.4161/hv.28642), 2014-04-23
Supplement: hvi-10-1859-s01.pdf [file hvi-10-1859-s01.pdf]

## **Supplemental Material to:**

**Usa Thisyakorn, Kulkanya Chokephaibulkit, Pope Kosalaraksa, Suwat Benjaponpitak, Chitsanu Pancharoen, and Sunate Chuenkitmongkol**

**Immunogenicity and safety of 23-valent pneumococcal polysaccharide vaccine as a booster dose in 12- to 18-month-old children primed with 3 doses of 7-valent pneumococcal conjugate vaccine**

**Human Vaccines & Immunotherapeutics 2014; 10(7)  
<http://dx.doi.org/10.4161/hv.28642>**

**[www.landesbioscience.com/journals/vaccines/article/28642](http://www.landesbioscience.com/journals/vaccines/article/28642)**

**Supplemental Table 1. Duration of solicited reactions**

| <b>Reaction</b>           | <b>Duration</b> | <b>PPV23</b> |          | <b>PCV7</b> |          |
|---------------------------|-----------------|--------------|----------|-------------|----------|
|                           |                 | <b>n</b>     | <b>%</b> | <b>n</b>    | <b>%</b> |
| Injection site tenderness | 1-3 days        | 95           | 96.0     | 83          | 94.3     |
|                           | 4-7 days        | 4            | 4.0      | 5           | 5.7      |
|                           | 8 days          | 0            | 0.0      | 0           | 0.0      |
| Injection site erythema   | 1-3 days        | 54           | 90.0     | 49          | 92.5     |
|                           | 4-7 days        | 6            | 10.0     | 4           | 7.5      |
|                           | 8 days          | 0            | 0.0      | 0           | 0.0      |
| Injection site swelling   | 1-3 days        | 29           | 82.9     | 26          | 78.8     |
|                           | 4-7 days        | 6            | 17.1     | 7           | 21.2     |
|                           | 8 days          | 0            | 0.0      | 0           | 0.0      |
| Fever                     | 1-3 days        | 27           | 93.1     | 18          | 90.0     |
|                           | 4-7 days        | 1            | 3.4      | 2           | 10.0     |
|                           | 8 days          | 1            | 3.4      | 0           | 0.0      |
| Vomiting                  | 1-3 days        | 25           | 89.3     | 11          | 68.8     |
|                           | 4-7 days        | 3            | 10.7     | 5           | 31.3     |
|                           | 8 days          | 0            | 0.0      | 0           | 0.0      |
| Abnormal crying           | 1-3 days        | 48           | 94.1     | 38          | 82.6     |
|                           | 4-7 days        | 3            | 5.9      | 8           | 17.4     |
|                           | 8 days          | 0            | 0.0      | 0           | 0.0      |
| Drowsiness                | 1-3 days        | 20           | 100.0    | 19          | 79.2     |
|                           | 4-7 days        | 0            | 0.0      | 5           | 20.8     |
|                           | 8 days          | 0            | 0.0      | 0           | 0.0      |
| Loss of appetite          | 1-3 days        | 31           | 75.6     | 28          | 68.3     |
|                           | 4-7 days        | 8            | 19.5     | 11          | 26.8     |
|                           | 8 days          | 2            | 4.9      | 2           | 4.9      |
| Irritability              | 1-3 days        | 45           | 83.3     | 52          | 81.3     |
|                           | 4-7 days        | 6            | 11.1     | 11          | 17.2     |
|                           | 8 days          | 3            | 5.6      | 1           | 1.6      |
